# Supplementary material for: Antitumor and Radiosensitization Effects of a CXCR2 Inhibitor in Nasopharyngeal Carcinoma
Source: PubMed Central journal article supplement (PMC8188356; doi:10.3389/fcell.2021.689613), 2021-05-26
Supplement: Image_1.pdf [file Image_1.pdf]

## Supplementary Figure 1

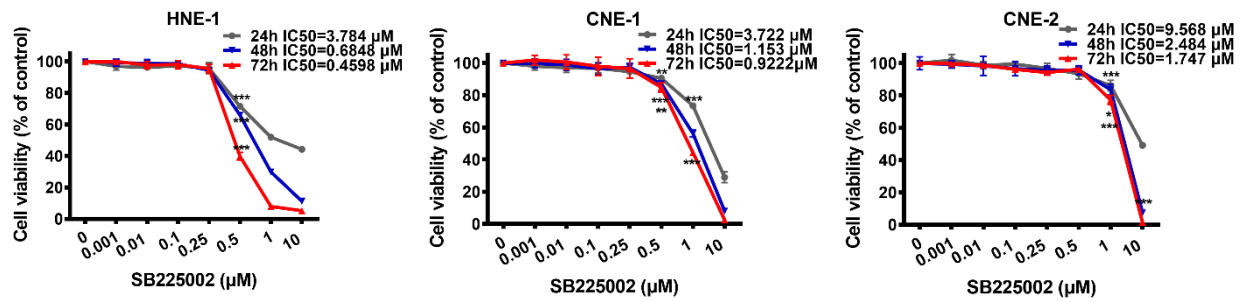

**Supplementary Figure 1. SB225002 suppresses cell proliferation in vitro.** SB225002 inhibited cell proliferation. HNE-1, CNE-1 and CNE-2 human nasopharyngeal cancer cells were treated with SB225002 for (24, 48 and 72 h), cell viability was evaluated by CCK8 assay (\*\* $p < 0.01$ ; \*\*\* $p < 0.001$ ; Student's t-test). Values represent mean  $\pm$  SD ( $n = 5$ ).
