# Supplementary material for: Antitumor and Radiosensitization Effects of a CXCR2 Inhibitor in Nasopharyngeal Carcinoma
Source: PubMed Central journal article supplement (PMC8188356; doi:10.3389/fcell.2021.689613), 2021-05-26
Supplement: Image_3.pdf [file Image_3.pdf]

### Supplementary Figure 3

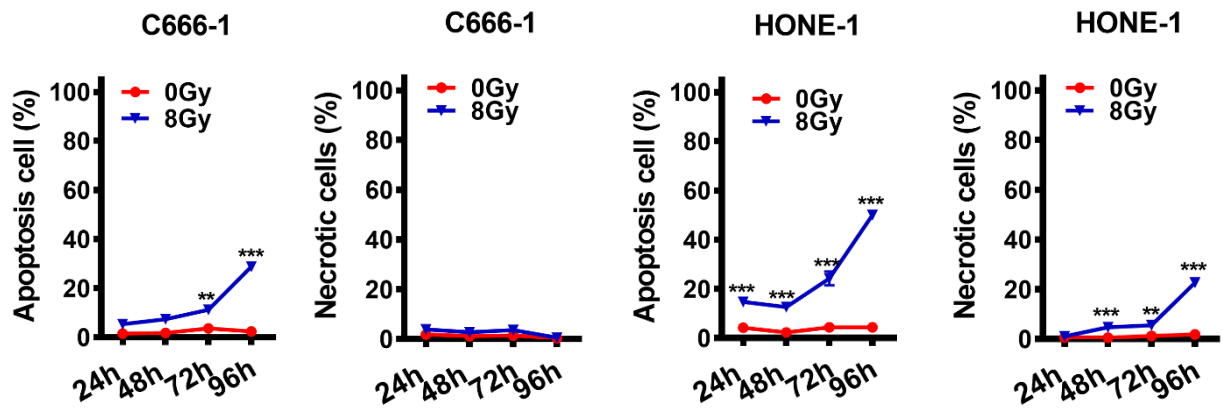

**Supplementary Figure 3. The cell death induced by irradiation.** C666-1 and HONE-1 cell was administrated with a 8Gy irradiation and the apoptosis and necrosis were examined using the AnnexinV-FITC/PI at indicated timepoints, as determined by flow cytometry.
